# Supplementary material for: Cigarette smoke inhalation aggravates diabetic kidney injury in rats
Source: Royal Society of Chemistry journal article supplement (doi:10.1039/c9tx00201d), 2019-10-29
Supplement: c9tx00201d1.pdf [file c9tx00201d1.pdf]

## Supplemental figure

### Tubules (GSE30529)

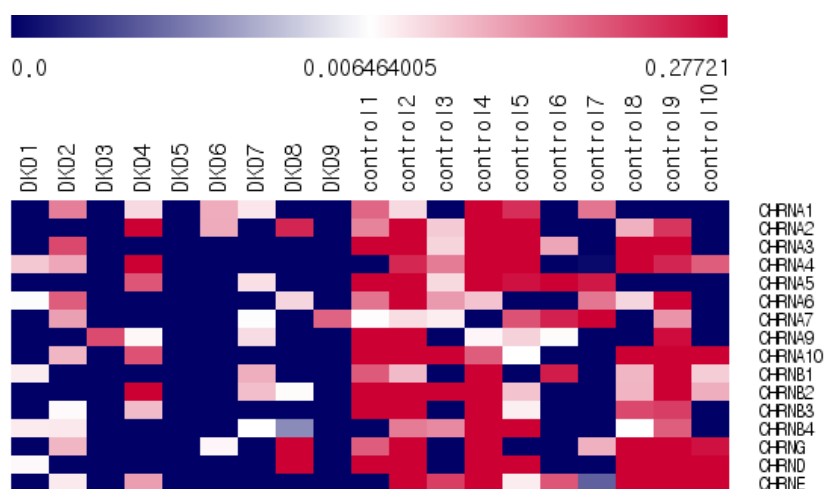

### Glomeruli (GSE30528)

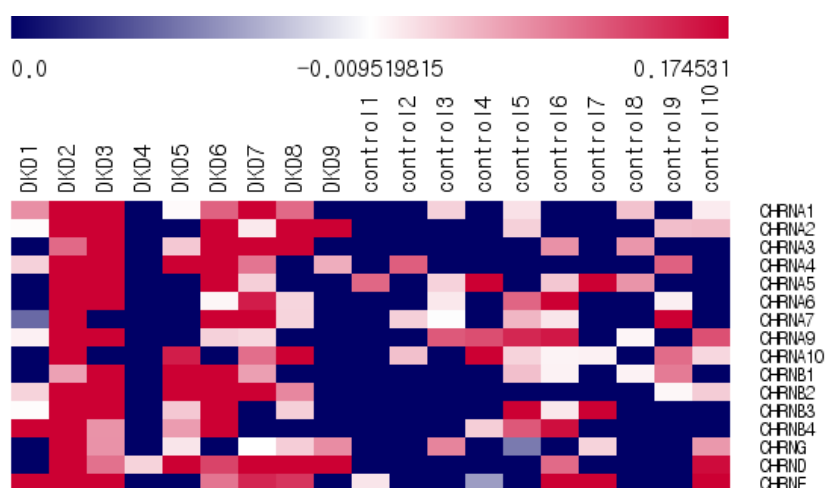

**Fig. 1.** Differently expressed nAChR in DKD tubules and glomeruli compared with healthy controls. Analysis of nAChR gene expression in Gene Expression Omnibus database (GSE30528 and GSE30529), previously reported in diabetes. CHRNA, acetylcholine receptor subunit alpha; CHRNB, acetylcholine receptor subunit beta; CHRNG, acetylcholine receptor subunit gamma; CHRND, acetylcholine receptor subunit delta; CHRNE, acetylcholine receptor subunit epsilon.
